# Supplementary material
Source: PubMed Central journal article supplement (PMC4764452)
Supplement: NIHMS738406-supplement-Supplemental_Digital_Content.pdf [file NIHMS738406-supplement-Supplemental_Digital_Content.pdf]

## **Appendix.**

The following invited scientists participated in the conference:

William Benitz, Stanford University, Palo Alto, CA

Reese Clark, Pediatrix Medical Group, Sunrise, FL

Brenna Hughes, Warren Alpert Medical School of Brown University, Providence, RI

Alan Jobe, Cincinnati Children's Hospital, Cincinnati, OH

Menachem Miodovnik, NICHD, Bethesda, MD

Josef Neu, University of Florida, Gainesville, FL

Uma Reddy, NICHD, Bethesda, MD

Bahaeddine Sibai, University of Texas at Houston, Houston, TX

Catherine Spong, NICHD, Bethesda, MD

Sidhartha Tan, University of Chicago, Chicago, IL

Stephanie Archer, NICHD, Bethesda, MD

Robin Baker, Inova Children's Hospital, Falls Church, VA

Catalin Buhimschi, Ohio State University, Columbus, OH

Maurice Davis, NICHD, Bethesda, MD

Gerald Joseph, American College of Obstetricians and Gynecologists (ACOG), Washington, DC

Hal Hawkins, University of Texas Medical Branch, Galveston, TX

John Ilekis, NICHD, Bethesda, MD

Sunil Jain, University of Texas Medical Branch, Galveston, TX

Ramkumar Menon, University of Texas Medical Branch, Galveston, TX

Tara Randis, Columbia University, New York, NY

Madeline Rice, George Washington University, Rockville, MD

Roberto Romero, NICHD –Perinatology Research Branch, Detroit, MI

Renate Savich, University of Mississippi Medical Center, Jackson, MI

Elizabeth Thom, George Washington University, Rockville, MD

Higgins RD, Saade G, Polin RA, Grobman WA, Buhimschi IA, Watterberg K, et al Evaluation and management of women and newborns with a maternal diagnosis of chorioamnionitis: summary of a workshop. *Obstet Gynecol* 2016;127.

The authors provided this information as a supplement to their article.

© Copyright 2016 American College of Obstetricians and Gynecologists.

Susan Tolivaisa, NICHD, Bethesda, MD

Higgins RD, Saade G, Polin RA, Grobman WA, Buhimschi IA, Watterberg K, et al Evaluation and management of women and newborns with a maternal diagnosis of chorioamnionitis: summary of a workshop. *Obstet Gynecol* 2016;127.

The authors provided this information as a supplement to their article.

© Copyright 2016 American College of Obstetricians and Gynecologists.
